# Supplementary material for: Imine hydrogenation by alkylaluminum catalysts
Source: Royal Society of Chemistry journal article supplement (doi:10.1039/c3cc47889k), 2013-11-11
Supplement: c3cc47889k.pdf [file c3cc47889k.pdf]

## Supporting Information for

# Imine Hydrogenation by Alkylaluminum Catalysts

Jillian A. Hatnean<sup>a</sup>, Jordan W. Thomson<sup>b</sup>, Preston A. Chase<sup>b</sup> and Douglas W Stephan<sup>a\*</sup>

### *SI. Synthesis and Isolation of Compounds*

#### General considerations

All synthetic manipulations were carried out under an atmosphere of dry, O<sub>2</sub>-free N<sub>2</sub> employing an MBraun glove box and a Schlenk vacuum-line. Toluene was purified with a Grubbs-type column system manufactured by Innovative Technology and dispensed into thick-walled glass Schlenk bombs equipped with Young-type Teflon valve stopcocks. Chloroform-*d* and bromobenzene-*d*<sub>5</sub> were each dried over CaH<sub>2</sub>, vacuum-transferred into a Young bomb, and stored over 4 Å molecular sieves. Toluene-*d*<sub>8</sub> and benzene-*d*<sub>6</sub> were dried over Na/benzophenone, vacuum-transferred into a Young bomb, and stored over 4 Å molecular sieves. All solvents were thoroughly degassed after purification (three freeze-pump-thaw cycles). NMR spectra were recorded at 25 °C on a Bruker Avance 400 MHz spectrometer. Chemical shifts are given relative to SiMe<sub>4</sub> and referenced to the residual solvent signal (<sup>1</sup>H, <sup>13</sup>C) or relative to an external standard (<sup>27</sup>Al: Al(NO<sub>3</sub>)<sub>3</sub>). Chemical shifts are reported in ppm and coupling constants as scalar values in Hz. Elemental analyses were performed in house by ANALEST on a 2400 Series II CHNS Analyzer. Diisobutylaluminum hydride (DIBAL, **1**) and commercially available substrates MeN=CHPh, (Me<sub>3</sub>Si)N=CHPh, PhN=CHPh, (Ph<sub>2</sub>CH)N=CHPh, *t*BuN=CHPh, (PhO<sub>2</sub>S)N=CHPh, and 1,3,3-trimethyl-2-methyleneindoline were obtained from Sigma-Aldrich. Commercially available 1-cyclohexen-1-ylpiperidine was obtained from Alfa Aesar. Commercially available BnN=CHPh was obtained from Acros Organics. Triisobutylaluminum (TIBAL, **2**) was purchased from Strem. Liquid substrates were stored over 4 Å molecular sieves or distilled from TIBAL and stored in an inert atmosphere glovebox. Solid substrates were dried *in vacuo* and stored in an inert atmosphere glovebox. Hydrogen gas (Grade 5.0) was obtained from Linde and purified through a Matheson Model 450B or Matheson Nanochem WeldAssure<sup>TM</sup> gas purifier. The compound *i*Bu<sub>2</sub>AlD<sup>1</sup> and substrates PhN=CH(*p*-BrC<sub>6</sub>H<sub>4</sub>),<sup>2</sup> *t*BuN=CH(*p*-*t*BuC<sub>6</sub>H<sub>4</sub>),<sup>3</sup> (2,6-Me<sub>2</sub>Ph)N=C(Me)Ph,<sup>4</sup> *t*BuN=CH(*p*-NMe<sub>2</sub>C<sub>6</sub>H<sub>4</sub>),<sup>5</sup> *t*BuN=CH(*m*-BrC<sub>6</sub>H<sub>4</sub>),<sup>6</sup> *t*BuN=CH(*p*-BrC<sub>6</sub>H<sub>4</sub>),<sup>7</sup> (*p*-ClC<sub>6</sub>H<sub>4</sub>)N=CHPh<sup>8</sup> and *t*BuN=CH(*m*-OMeC<sub>6</sub>H<sub>4</sub>)<sup>6</sup> were prepared via literature methods. A series of hydrogenation experiments were performed either in a Parr Pressure reactor or a J. Young tube. Details are provided below.

**General procedure for elevated pressure reductions:** In a N<sub>2</sub> filled glove box, substrate (Entries 1, 5–8, 10–14: 0.7 mmol; Entries 2–4, 9 and 15: 0.5 mmol) was weighed in a 2 dram vial and dissolved in toluene (0.3 ml). To this was added catalyst (5 mol% of **1** (DIBAL) or 10 mol% of **2** (TIBAL)) and the imine/catalyst solution was thoroughly mixed. Seven vials were then transferred to a Parr pressure reactor. The reactor was sealed, removed from the glovebox and attached to a thoroughly purged hydrogen gas line. The reactor was purged five times at 50 atm hydrogen and five times at 92 atm H<sub>2</sub>. The reactor was sealed under 92 atm H<sub>2</sub>, and placed on a stir plate heated to 100 °C (final pressure 102 atm H<sub>2</sub>) for 24 h. The reactor was cooled, slowly vented and an NMR sample was taken in CDCl<sub>3</sub>. Conversion of unsaturated substrate to amine product was determined by <sup>1</sup>H NMR spectroscopy.

**General procedure for amine isolation:** The solvent was removed *in vacuo*, and the resulting oil/solid dissolved in EtOAc. To this, 2 mL of water was added, and the organic layer decanted. The aqueous layer was extracted 2 x 5 mL of EtOAc. The combined organic fractions were treated with MgSO<sub>4</sub>, filtered through a plug of Celite, and dried *in vacuo*. Analysis by <sup>1</sup>H NMR spectroscopy revealed that compound *N*-benzyl(trimethylsilyl)amine decomposed upon aqueous workup. Compound *N*-benzylaniline required additional column chromatography for purification.

#### Product characterization data:

Products (isolated and crude) were characterized by <sup>1</sup>H and <sup>13</sup>C{<sup>1</sup>H} NMR spectroscopy and compared to literature values where applicable.

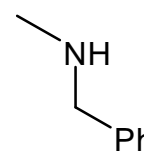 ***N*-benzylmethanamine (entry 1):** ref<sup>9</sup> (colourless oil, 81 mg, 95 % isolated yield) <sup>1</sup>H NMR (400 MHz, CDCl<sub>3</sub>): δ 7.35-7.31 (m, 5H, C<sub>6</sub>H<sub>5</sub>); 3.75 (s, 2H, CH<sub>2</sub>); 2.46 (s, 3H, CH<sub>3</sub>). <sup>13</sup>C{<sup>1</sup>H} NMR (101 MHz, CDCl<sub>3</sub>): δ 139.2, 128.5, 128.4 and 128.3 (Ph-C); 56.3 (CH<sub>2</sub>); 36.2 (CH<sub>3</sub>).

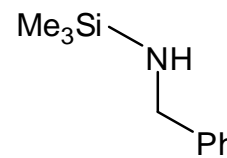 ***N*-benzyl(trimethylsilyl)amine (entry 2):** ref<sup>10</sup> <sup>1</sup>H NMR (400 MHz, CDCl<sub>3</sub>): δ 7.42 (m, 3H, C<sub>6</sub>H<sub>5</sub>); 7.36 (m, 3H, C<sub>6</sub>H<sub>5</sub>); 3.94 (d, 2H, CH<sub>2</sub>, <sup>3</sup>J<sub>HH</sub> = 8.3 Hz); 0.11 (s, 9H, Si(CH<sub>3</sub>)<sub>3</sub>). <sup>13</sup>C{<sup>1</sup>H} NMR (101 MHz, CDCl<sub>3</sub>): δ 139.4, 128.7, 128.1 and 127.1 (Ph-C); 49.2 (CH<sub>2</sub>); 2.1 (s with Si satellites, Si-CH<sub>3</sub>, <sup>1</sup>J<sub>CSi</sub> = 58 Hz).

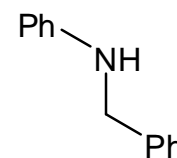 ***N*-benzylaniline (entry 3):** ref<sup>11</sup> (white solid, 80 mg, 87 % isolated yield) <sup>1</sup>H NMR (400 MHz, CDCl<sub>3</sub>): δ 7.3 (m, 4H, C<sub>6</sub>H<sub>5</sub>); 7.23 (m, 1H, *p*-C<sub>6</sub>H<sub>5</sub>); 7.12 (dd, 2H, C<sub>6</sub>H<sub>5</sub>, <sup>3</sup>J<sub>HH</sub> = 8, 6.7 Hz); 6.68 (t, 1H, *p*-C<sub>6</sub>H<sub>5</sub>, <sup>3</sup>J<sub>HH</sub> = 6.7 Hz); 6.56 (d, 2H, *o*-C<sub>6</sub>H<sub>5</sub>, <sup>3</sup>J<sub>HH</sub> = 8.8 Hz); 4.23 (s, 2H, CH<sub>2</sub>); 3.90 (br, 1H, NH). <sup>13</sup>C{<sup>1</sup>H} NMR (101 MHz, CDCl<sub>3</sub>): δ 148.2, 139.5, 129.3, 128.7, 127.5, 127.2, 117.6 and 112.9 (Ph-C); 48.3 (CH<sub>2</sub>).

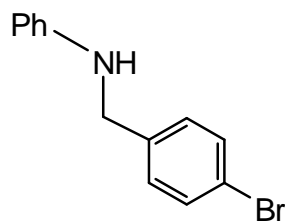

***N*-(4-bromobenzyl)aniline (entry 4):** ref<sup>12</sup> <sup>1</sup>H NMR (400 MHz, CDCl<sub>3</sub>): δ 7.45 (d, 2H, C<sub>6</sub>H<sub>5</sub>, <sup>3</sup>J<sub>HH</sub> = 8 Hz) 7.25-7.18 (m, 3H, C<sub>6</sub>H<sub>5</sub>); 6.72 and 6.62 (d, 4H, *p*-BrC<sub>6</sub>H<sub>4</sub>, <sup>3</sup>J<sub>HH</sub> = 8.7 Hz); 4.29 (d, 2H, CH<sub>2</sub>, <sup>3</sup>J<sub>HH</sub> = 6.9 Hz); 4.03 (br m, 1H, NH). <sup>13</sup>C{<sup>1</sup>H} NMR (101 MHz, CDCl<sub>3</sub>): δ 147.0, 138.1, 129.9, 129.2, 129.1, 118.2 and 113.4 (Ph-C); 47.9 (CH<sub>2</sub>).

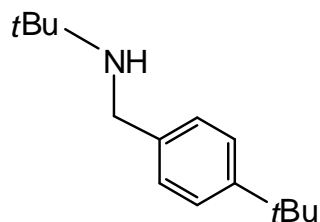

(*t*Bu-CH<sub>3</sub>).

***N*-(4-*tert*-butylbenzyl)-*tert*-butylamine (entry 5):** (white solid, 149 mg, 97 % isolated yield) <sup>1</sup>H NMR (400 MHz, CDCl<sub>3</sub>): δ 7.47 and 7.36 (d, 4H, *p*-*t*BuC<sub>6</sub>H<sub>4</sub>, <sup>3</sup>J<sub>HH</sub> = 7 Hz); 3.65 (d, 2H, CH<sub>2</sub>, <sup>3</sup>J<sub>HH</sub> = 7.7 Hz); 1.34 (s, 9H, *p*-*t*Bu-CH<sub>3</sub>); 1.17 (s, 9H, *t*Bu-CH<sub>3</sub>); 0.81 (br t, 1H, NH). <sup>13</sup>C{<sup>1</sup>H} NMR (101 MHz, CDCl<sub>3</sub>): δ 144.1, 139.2, 132.9 and 126.8 (Ph-C); 57.5 and 50.6 (*t*Bu-C); 46.6 (CH<sub>2</sub>); 29.6 and 29.1

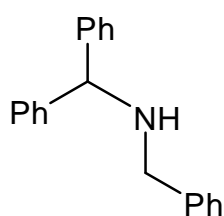

***N*-benzyl-diphenylmethanamine (entry 6):** ref<sup>13</sup> (pale yellow solid, 186 mg, 97 % isolated yield) <sup>1</sup>H NMR (400 MHz, CDCl<sub>3</sub>): δ 7.32-7.10 (m, 15H, C<sub>6</sub>H<sub>5</sub>); 4.88 (d, 1H, CH, <sup>3</sup>J<sub>HH</sub> = 3.8 Hz); 3.76 (d, 1H, CH<sub>2</sub>, <sup>3</sup>J<sub>HH</sub> = 7.6 Hz); 1.85 (m, 1H, NH). <sup>13</sup>C{<sup>1</sup>H} NMR (101 MHz, CDCl<sub>3</sub>): δ 144.1, 140.6, 128.4, 128.3, 128.2, 127.4, 127.1 and 127.0 (Ph-C); 66.5 (CH); 51.9 (CH<sub>2</sub>).

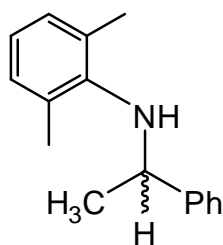

***rac*-2,6-dimethyl-*N*-(1-phenylethyl)aniline (entry 7):** (pale yellow solid, 151 mg, 94 % isolated yield) <sup>1</sup>H NMR (400 MHz, CDCl<sub>3</sub>): δ 7.29 and 7.20 (m, 5H, C<sub>6</sub>H<sub>5</sub>); 7.02 (d, 2H, *m*-(2,6-Me<sub>2</sub>)C<sub>6</sub>H<sub>3</sub>, <sup>3</sup>J<sub>HH</sub> = 8 Hz); 6.88 (t, 1H, *p*-(2,6-Me<sub>2</sub>)C<sub>6</sub>H<sub>3</sub>, <sup>3</sup>J<sub>HH</sub> = 8 Hz); 4.35 (dq, 1H, CH, <sup>3</sup>J<sub>HH</sub> = 10.3, 6.8 Hz); 3.20 (d, 1H, NH, <sup>3</sup>J<sub>HH</sub> = 10.3 Hz); 2.20 (s, 6H, (2,6-CH<sub>3</sub>)<sub>2</sub>Ph); 1.52 (s, 3H, CH<sub>3</sub>, <sup>3</sup>J<sub>HH</sub> = 6.8 Hz). <sup>13</sup>C{<sup>1</sup>H} NMR (101 MHz, CDCl<sub>3</sub>): δ 145.3, 145.0, 129.1, 128.4, 128.2, 127.0, 126.1 and 121.7 (Ph-C); 56.8 (CH); 22.6 (CH<sub>3</sub>); 18.9 (2,6-CH<sub>3</sub>).

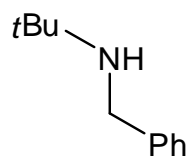

***N*-benzyl-*tert*-butylamine (entry 8):** ref<sup>14</sup> <sup>1</sup>H NMR (CDCl<sub>3</sub>, 400 MHz): δ 7.25 and 7.23 (m, 4H, *o* and *m*-Ph-H); 7.15 (tt, 1H, *p*-Ph-H, <sup>3</sup>J<sub>HH</sub> = 6.9 Hz, <sup>4</sup>J<sub>HH</sub> = 1.6 Hz); 3.65 (s, 2H, CH<sub>2</sub>); 1.11 (s, 9H, *t*Bu-CH<sub>3</sub>). <sup>13</sup>C{<sup>1</sup>H} NMR (CDCl<sub>3</sub>, 101 MHz): δ 141.4, 128.2, 128.1 and 126.6 (Ph-C); 50.5 (*t*Bu-C); 47.1 (CH<sub>2</sub>); 29.0 (*t*Bu-CH<sub>3</sub>).

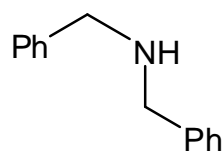

**Dibenzylamine (entry 9):** <sup>1</sup>H NMR (400 MHz, CDCl<sub>3</sub>): δ 7.39-7.33 (m, 10H, C<sub>6</sub>H<sub>5</sub>); 3.79 (d, 2H, CH<sub>2</sub>, <sup>3</sup>J<sub>HH</sub> = 6.5 Hz); 1.51 (br t, 1H, NH). <sup>13</sup>C{<sup>1</sup>H} NMR (101 MHz, CDCl<sub>3</sub>): δ 140.4, 129.1, 128.4 and 127.0 (Ph-C); 53.2 (CH<sub>2</sub>).

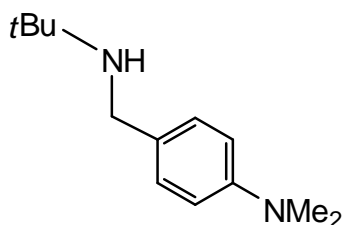

***N*-(4-dimethylaminobenzyl)-*tert*-butylamine (entry 10):** <sup>1</sup>H NMR (400 MHz, CDCl<sub>3</sub>): δ 7.51 and 7.45 (d, 4H, *p*-NMe<sub>2</sub>C<sub>6</sub>H<sub>4</sub>, <sup>3</sup>J<sub>HH</sub> = 9.1 Hz); 3.65 (d, 2H, CH<sub>2</sub>, <sup>3</sup>J<sub>HH</sub> = 7.7 Hz); 2.38 (s, 6H,

$N(CH_3)_2$ ; 1.20 (s, 9H, *t*Bu-CH<sub>3</sub>).  $^{13}C\{^1H\}$  NMR (101 MHz, CDCl<sub>3</sub>):  $\delta$  136.2, 131.5, 130.0 and 120.5 (Ph-C); 50.8 (*t*Bu-C); 46.7 (CH<sub>2</sub>); 29.7 (NCH<sub>3</sub>); 29.2 (*t*Bu-CH<sub>3</sub>).

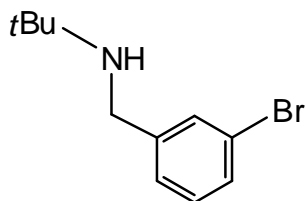

***N*-(3-bromobenzyl)-*tert*-butylamine (entry 11):**  $^1H$  NMR (400 MHz, CDCl<sub>3</sub>):  $\delta$  7.41–7.30, 7.23 and 7.18 (m, 4H, C<sub>6</sub>H<sub>5</sub>); 3.73 (br s, 2H, CH<sub>2</sub>); 1.21 (s, 9H, *t*Bu-CH<sub>3</sub>).  $^{13}C\{^1H\}$  NMR (101 MHz, CDCl<sub>3</sub>):  $\delta$  138.5, 133.7, 128.4, 128.1, 127.9 and 125.4 (Ph-C); 50.4 (*t*Bu-C); 46.8 (CH<sub>2</sub>); 29.1 (*t*Bu-CH<sub>3</sub>).

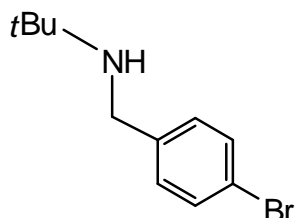

***N*-(4-bromobenzyl)-*tert*-butylamine (entry 12):**  $^1H$  NMR (400 MHz, CDCl<sub>3</sub>):  $\delta$  7.43 and 7.21 (d, 4H, *p*-BrC<sub>6</sub>H<sub>4</sub>,  $^3J_{HH} = 8.3$  Hz); 3.65 (d, 2H, CH<sub>2</sub>,  $^3J_{HH} = 7.8$  Hz); 1.18 (s, 9H, *t*Bu-CH<sub>3</sub>); 0.89 (br t, 1H, NH).  $^{13}C\{^1H\}$  NMR (101 MHz, CDCl<sub>3</sub>):  $\delta$  140.7, 131.4, 130.0 and 120.4 (Ph-C); 50.7 (*t*Bu-C); 46.6 (CH<sub>2</sub>); 29.2 (*t*Bu-CH<sub>3</sub>).

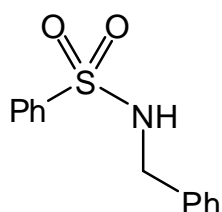

***N*-benzylbenzenesulfonamide (entry 13):** ref<sup>15</sup>  $^1H$  NMR (400 MHz, CDCl<sub>3</sub>):  $\delta$  8.05 (d, 2H, SO<sub>2</sub>C<sub>6</sub>H<sub>5</sub>,  $^3J_{HH} = 8$  Hz); 7.89 (m, 3H, SO<sub>2</sub>C<sub>6</sub>H<sub>5</sub>); 7.57–7.48 (m, 5H, C<sub>6</sub>H<sub>5</sub>); 5.33 (t, 1H, NH,  $^3J_{HH} = 6$  Hz); 4.13 (d, 2H, CH<sub>2</sub>,  $^3J_{HH} = 6$  Hz).  $^{13}C\{^1H\}$  NMR (101 MHz, CDCl<sub>3</sub>):  $\delta$  140.3, 136.5, 129.3, 128.7, 127.9 and 127.3 (Ph-C); 47.5 (CH<sub>2</sub>).

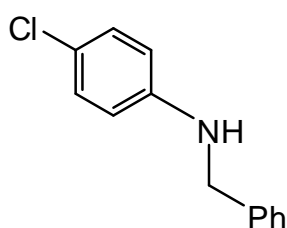

***N*-benzyl-4-chloroaniline (entry 14):** ref<sup>12</sup>  $^1H$  NMR (400 MHz, CDCl<sub>3</sub>):  $\delta$  7.33–7.26 (m, 5H, C<sub>6</sub>H<sub>5</sub>); 7.10 and 6.43 (d, 4H, *p*-ClC<sub>6</sub>H<sub>4</sub>,  $^3J_{HH} = 8.3$  Hz); 4.15 (d, 2H, CH<sub>2</sub>,  $^3J_{HH} = 7.7$  Hz); 3.95 (br, 1H, NH).  $^{13}C\{^1H\}$  NMR (101 MHz, CDCl<sub>3</sub>):  $\delta$  146.6, 138.8, 129.2, 128.8, 127.5, 122.1 and 113.9 (Ph-C); 48.2 (CH<sub>2</sub>).

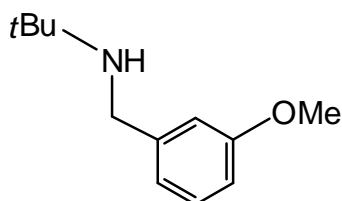

***N*-(3-methoxybenzyl)-*tert*-butylamine (entry 15):** ref<sup>16</sup>  $^1H$  NMR (CDCl<sub>3</sub>, 400 MHz):  $\delta$  7.22 (dd, 1H, 5-Ph-*H*,  $^3J_{HH} = 8.0$  Hz,  $^3J_{HH} = 8.0$  Hz); 6.93 (s, 1H, 2-Ph-*H*); 6.93 (m, 1H, 4-Ph-*H*); 6.78 (dd, 1H, 6-Ph-*H*,  $^3J_{HH} = 8.3$  Hz,  $^3J_{HH} = 2.2$  Hz); 3.80 (s, 1H, OCH<sub>3</sub>); 3.71 (s, 2H, CH<sub>2</sub>); 1.17 (s, 9H, *t*Bu-CH<sub>3</sub>).  $^{13}C\{^1H\}$  NMR (CDCl<sub>3</sub>, 101 MHz):  $\delta$  158.7, 141.8, 128.4, 119.6, 121.8, and 111.4 (Ph-C); 54.1 (OCH<sub>3</sub>); 49.9 (*t*Bu-C); 46.2 (CH<sub>2</sub>); 28.0 (*t*Bu-CH<sub>3</sub>).

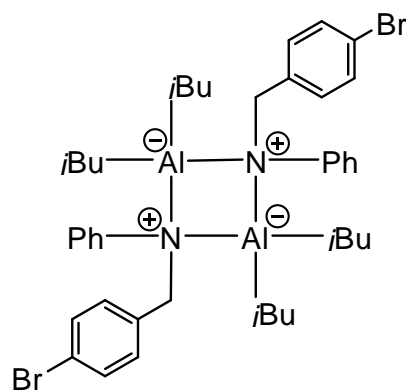

**Synthesis of  $[i\text{Bu}_2\text{AlN}(\text{Ph})(p\text{-BrBn})]_2$  (**3**).** A 1.0 M solution of DIBAL in toluene (0.35 mL, 0.35 mmol) was added to the imine  $\text{PhN}=\text{CH}(p\text{-BrC}_6\text{H}_4)$  (91 mg, 0.35 mmol) in a vial. The red solution was left on the shelf at room temperature overnight, whereupon colourless X-ray quality crystals precipitated from the solution. The supernatant was decanted, the crystals washed with a small amount of cold pentane, then dried *in vacuo* yielding a white solid (131 mg, 92% yield).

**$^1\text{H}$  NMR (400 MHz,  $\text{C}_6\text{D}_5\text{Br}$ ):**  $\delta$  7.11 (d, 4H,  $m\text{-C}_6\text{H}_4\text{Br}$ ,  $^3J_{\text{HH}} = 8.8$  Hz); 7.04 (m, 8H,  $o/m\text{-C}_6\text{H}_5$ ); 6.83 (t, 2H,  $p\text{-C}_6\text{H}_5$ ,  $^3J_{\text{HH}} = 6.8$  Hz); 6.72 (d, 4H,  $o\text{-C}_6\text{H}_4\text{Br}$ ,  $^3J_{\text{HH}} = 8.8$  Hz); 4.47 (s, 4H,  $\text{Bn-CH}_2$ ); 2.01 and 1.84 (m, 4H,  $i\text{Bu-CH}$ ); 1.09, 1.06, 0.99 and 0.95 (d, 24H,  $i\text{Bu-CH}_3$ ,  $^3J_{\text{HH}} = 6.6$  Hz); 0.40, 0.38, 0.24 and 0.23 (d, 8H,  $i\text{Bu-CH}_2$ ,  $^3J_{\text{HH}} = 7.6, 7.3, 7$  Hz).  **$^{13}\text{C}\{^1\text{H}\}$  NMR (101 MHz,  $\text{C}_6\text{D}_5\text{Br}$ ):**  $\delta$  145.8, 139.6, 130.9, 129.2, 128.6, 128.2, 123.9 and 123.6 (Ar-C); 53.3 ( $\text{CH}_2$ ); 27.9, 27.6, 27.5 and 27.4 ( $i\text{Bu-CH}_3$ ); 25.9 and 25.6 ( $i\text{Bu-CH}_2$ ); 21.4 and 21.0 ( $i\text{Bu-CH}$ ).  **$^{27}\text{Al}$  NMR (104 MHz,  $\text{C}_6\text{D}_5\text{Br}$ ):**  $\delta$  67.6 (br s,  $W_{1/2} = 4076$  Hz). **Anal. Calcd.** for  $\text{C}_{42}\text{H}_{58}\text{Al}_2\text{Br}_2\text{N}_2$ : C 62.69%, H 7.26%, N 3.48%. Found C 62.31%, H 6.99%, N 3.51%.

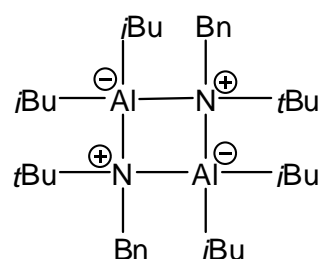

**Synthesis of  $[i\text{Bu}_2\text{AlN}(t\text{Bu})\text{Bn}]_2$  (**4**).** A 1.0 M solution of DIBAL in toluene (0.35 mL, 0.35 mmol) was added to the imine  $t\text{BuN}=\text{CH}(\text{Ph})$  (57 mg, 0.35 mmol) in a vial. The colourless solution was allowed to react for 1 h and the solvent removed *in vacuo* yielding a colourless oil. (101 mg, 95% yield).

**$^1\text{H}$  NMR (400 MHz,  $\text{tol-}d_8$ ):**  $\delta$  7.12 (d, 4H,  $o\text{-C}_6\text{H}_4\text{Br}$ ,  $^3J_{\text{HH}} = 8.4$  Hz); 7.02 and 6.95 (m, 6H,  $m/p\text{-C}_6\text{H}_5$ ); 4.19 (s, 4H,  $\text{Bn-CH}_2$ ); 2.07 (m, 4H,  $i\text{Bu-CH}$ ); 1.11 and 1.10 (d, 24H,  $i\text{Bu-CH}_3$ ,  $^3J_{\text{HH}} = 6.6$  Hz); 0.53 (m, 8H,  $i\text{Bu-CH}_2$ ).  **$^{13}\text{C}\{^1\text{H}\}$  NMR (101 MHz,  $\text{tol-}d_8$ ):**  $\delta$  141.0, 128.5, 128.2 and 127.4 (Ar-C); 58.2 ( $\text{CH}_2$ ); 53.2 ( $t\text{Bu-C}$ ); 31.6 ( $t\text{Bu-CH}_3$ ); 28.5 and 28.2 ( $i\text{Bu-CH}_3$ ); 28.2 and 28.1 ( $i\text{Bu-CH}_2$ ); 26.9 ( $i\text{Bu-CH}$ ).  **$^{27}\text{Al}$  NMR (104 MHz,  $\text{tol-}d_8$ ):**  $\delta$  74.2 (br s,  $W_{1/2} = 3388$  Hz).

## S2. Mechanism

**Activation of dihydrogen by **3**.** In an inert atmosphere glovebox,  $[i\text{Bu}_2\text{AlN}(\text{Ph})(p\text{-BrBn})]_2$  (0.35 mmol) was dissolved in  $\text{C}_6\text{D}_5\text{Br}$  and placed in a J. Young NMR tube. The tube was sealed and subjected to three freeze-pump-thaw cycles. The tube was then frozen, evacuated and backfilled with 4 atm  $\text{H}_2$  gas. The tube was thawed and heated to 100 °C. Analysis of the crude reaction mixture after 10 h by  $^1\text{H}$  NMR spectroscopy revealed the presence of unreacted **3** and free amine  $\text{PhNHCH}_2(p\text{-BrC}_6\text{H}_4)$ . The reaction was allowed to continue overnight at 100 °C. The solvent was removed *in vacuo* and the residue redissolved in  $\text{CDCl}_3$ . The  $^1\text{H}$  NMR spectra below depict the change in  $\text{CH}_2$  chemical shift over time:

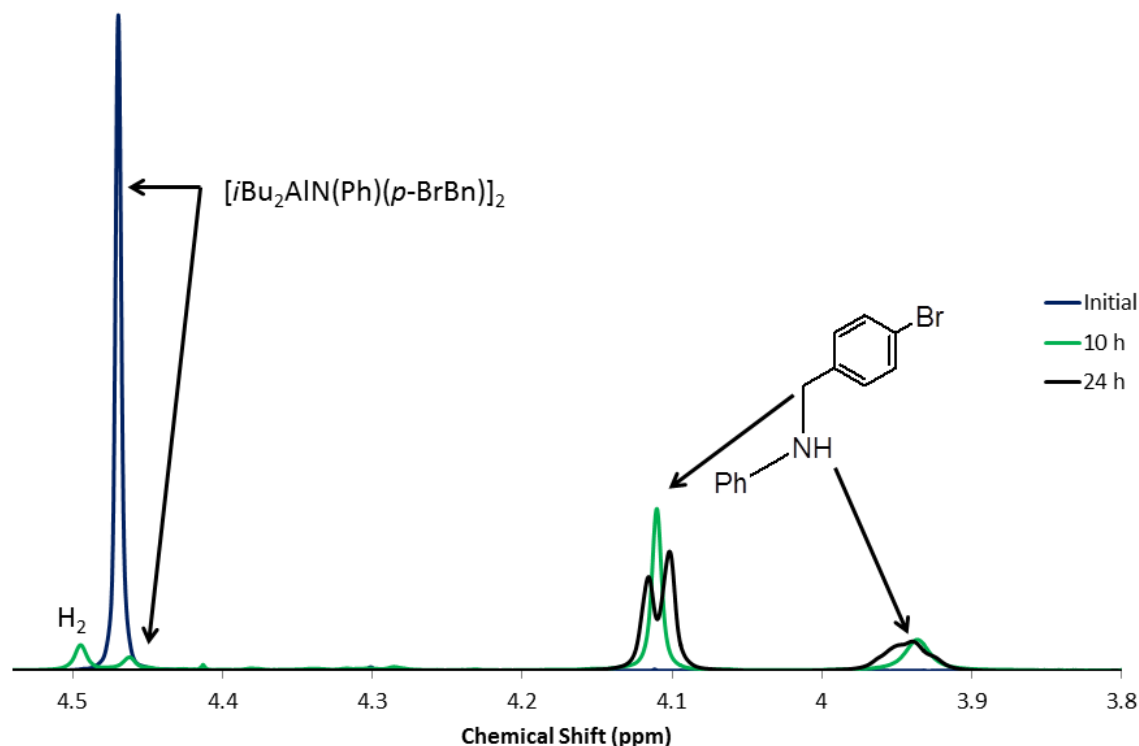

**Figure S2** –  $^1\text{H}$  NMR spectra (400 MHz) showing the change in  $\text{CH}_2$  chemical shift over time for the reaction of  $[\text{iBu}_2\text{AlN}(\text{Ph})(p\text{-BrBn})]_2$  (**3**) with  $\text{H}_2$  at  $100\text{ }^\circ\text{C}$  in  $\text{C}_6\text{D}_5\text{Br}$  overnight.

**Activation of  $\text{D}_2$  by **3**.** The activation of  $\text{D}_2$  was carried out in an analogous manner to that reported above for the activation of  $\text{H}_2$ ; however, deuterium gas was used in place of hydrogen gas, and  $\text{C}_6\text{H}_5\text{Br}$  was used in place of  $\text{C}_6\text{D}_5\text{Br}$ . Analysis of the crude reaction mixture by  $^1\text{H}$  NMR spectroscopy showed a broad singlet for the  $\text{CH}_2$  protons at  $\delta$  4.11, but no distinguishable resonance at  $\delta$  3.95 associated with NH of the corresponding amine. The  $^2\text{H}$  NMR spectrum displayed a weak, broad peak at  $\delta$  4 with no resolved coupling. These data support the formation of  $\text{PhNDCH}_2(p\text{-BrBn})$ .

The reaction was allowed to proceed for 1 week at  $100\text{ }^\circ\text{C}$ . Analysis of the crude reaction mixture by  $^1\text{H}$  NMR spectroscopy showed a broad multiplet for the  $\text{CH}_2$  protons at  $\delta$  4.11 accompanied with a decreased intensity, and a new broad, unresolved multiplet at  $\delta$  3.9 associated with NH of the corresponding amine. The  $^2\text{H}$  NMR spectrum displayed two weak, broad peaks at  $\delta$  4.1 and 4.0 with no resolved coupling. These data support a reversible mechanism enabling deuterium scrambling resulting in a mixture of products:  $\text{PhN}(\text{H}/\text{D})\text{CH}_2(p\text{-BrBn})$ ,  $\text{PhN}(\text{H}/\text{D})\text{CHD}(p\text{-BrBn})$  and  $\text{PhNDCD}_2(p\text{-BrBn})$ .

**Stoichiometric reaction of  $\text{iBu}_2\text{AlD}$ ,  $(2,6\text{-Me}_2\text{Ph})\text{N}=\text{C}(\text{Me})\text{Ph}$  and  $\text{H}_2$ .** In a  $\text{N}_2$  filled glove box,  $(2,6\text{-Me}_2\text{Ph})\text{N}=\text{C}(\text{Me})\text{Ph}$  (63 mg, 0.3 mmol) was weighed in a 2 dram vial dissolved in toluene (0.3 ml). To this was added  $\text{iBu}_2\text{AlD}$  (40 mg, 0.3 mmol) and the solution was thoroughly

mixed. Initial analysis by  $^2\text{H}$  NMR spectroscopy revealed a weak multiplet with 5 lines at  $\delta$  4.6 with a  $^3J_{\text{DH}}$  value of 2.6 Hz (Figure S3) indicative of CD coupling to  $\text{CH}_3$  (partial 1:3:6:7:6:3:1 septet). The corresponding 1:1:1 triplet in the  $^1\text{H}$  NMR could not be located as it coincides with the resonance associated with diethyl ether (*vide infra*).

The vial was then transferred to a Parr pressure reactor. The reactor was sealed, removed from the glovebox and attached to a thoroughly purged hydrogen gas line. The reactor was purged five times at 50 atm hydrogen and five times at 92 atm  $\text{H}_2$ . The reactor was sealed under 92 atm  $\text{H}_2$ , and placed on a stir plate heated to 100 °C (final pressure 102 atm  $\text{H}_2$ ) for 2 h. The reactor was cooled, slowly vented and an NMR sample was taken. Conversion of unsaturated substrate to amine product was determined by  $^1\text{H}$  NMR spectroscopy to be quantitative. The  $^1\text{H}$  NMR spectrum displayed a broad 1:1:1 triplet at  $\delta$  3.2 for the NH proton coupled to CD with a  $^3J_{\text{HD}}$  value of 1.6 Hz. This fails to integrate properly with the  $\text{CH}_3$  resonance, presumably due to H/D scrambling. A broad resonance can be located in the baseline at  $\delta$  4.6 due to CH. The  $^2\text{D}$  NMR spectrum revealed a weak, broad resonance at  $\delta$  4.6 for CD.

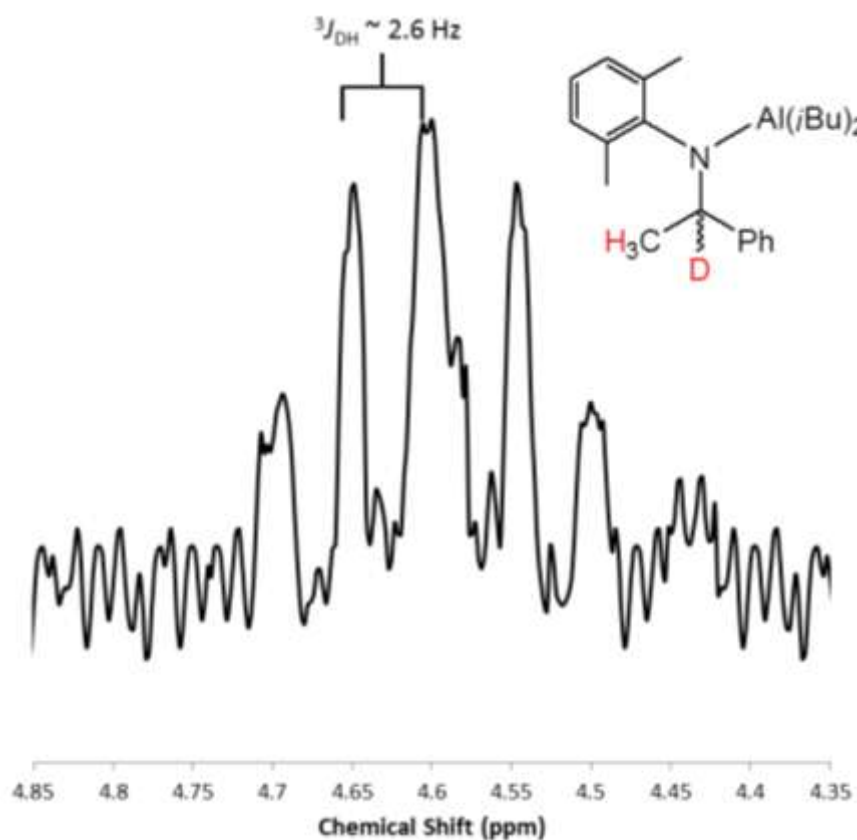



**Figure S3** –  $^2\text{H}$  NMR spectrum (61.4 MHz) showing 5 lines of a 1:3:6:7:6:3:1 septet ( $^3J_{\text{DH}} \sim 2.6$  Hz) for the stoichiometric reaction of *i*Bu<sub>2</sub>AID and (2,6-Me<sub>2</sub>Ph)N=C(Me)Ph in toluene before H<sub>2</sub> addition.

**Stoichiometric reaction of *i*Bu<sub>2</sub>AID, *t*BuN=CHPh and H<sub>2</sub>.** This reaction was carried out in an analogous manner to that reported above for (2,6-Me<sub>2</sub>Ph)N=C(Me)Ph; however *t*BuN=CHPh (45 mg, 0.3 mmol) was used as the substrate. The  $^1\text{H}$  NMR spectrum displayed a broad singlet at  $\delta$  3.6 for the CH<sub>2</sub> protons. The  $^2\text{D}$  NMR spectrum was silent.

**Note:** The above reactions with *i*Bu<sub>2</sub>AID took place in the presence of diethyl ether that could not be removed following its synthesis, even after repetitive distillations. This displays catalyst tolerance toward ether functionalities.

### S3. References

- (1) Eisch, J. J.; Rhee, S.-G. *J. Am. Chem. Soc.* **1974**, *96*, 7276.
- (2) Iovel, I.; Golomba, L.; Fleisher, M.; Popelis, J.; Grinberga, S.; Lukevics, E. *Chem. Heterocycl. Compd. (N. Y., NY, U. S.)* **2004**, *40*, 701.
- (3) Nanni, D.; Pareschi, P.; Walton, J. C. *J. Chem. Soc., Perkin Trans. 2* **2002**, 1098.
- (4) Dash, C.; Shaikh, M. M.; Butcher, R. J.; Ghosh, P. *Inorg. Chem.* **2010**, *49*, 4972.
- (5) Boyd, D. R.; Coulter, P. B.; Sharma, N. D.; Jennings, W. B.; Wilson, V. E. *Tetrahedron Lett.* **1985**, *26*, 1673.
- (6) Guimond, N.; Fagnou, K. *J. Am. Chem. Soc.* **2009**, *131*, 12050.
- (7) Markowicz, T.; Skolimowski, J.; Skowronski, R. *Pol. J. Chem.* **1981**, *55*, 2505.
- (8) Gupta, N.; Naaz, R.; Nigam, G. D. *Int. J. Pharma Bio Sci.* **2010**, *1*, 224.
- (9) Adima, A.; Bied, C.; Moreau, J. J. E.; Man, M. W. C. *Eur. J. Org. Chem.* **2004**, 2582.
- (10) Barany, M. J.; Hammer, R. P.; Merrifield, R. B.; Barany, G. *J. Am. Chem. Soc.* **2005**, *127*, 508.
- (11) Bagal, D. B.; Watile, R. A.; Khedkar, M. V.; Dhake, K. P.; Bhanage, B. M. *Catal. Sci. Technol.* **2012**, *2*, 354.
- (12) Sreedhar, B.; Reddy, P. S.; Devi, D. K. *J. Org. Chem.* **2009**, *74*, 8806.
- (13) Likhar, P. R.; Arundhathi, R.; Kantam, M. L.; Prathima, P. S. *Eur. J. Org. Chem.* **2009**, 5383.
- (14) Froyen, P.; Juvvik, P. *Tetrahedron Lett.* **1995**, *36*, 9555.
- (15) Shi, F.; Tse, M. K.; Zhou, S.; Pohl, M.-M.; Radnik, J.; Huebner, S.; Jaehnisch, K.; Brueckner, A.; Beller, M. *J. Am. Chem. Soc.* **2009**, *131*, 1775.
- (16) Farrell, J. M.; Hatnean, J. A.; Stephan, D. W. *J. Am. Chem. Soc.* **2012**, *134*, 15728.
